# Supplementary material for: Multi-ancestry GWAS of Long COVID identifies immune-related loci and etiological links to chronic fatigue syndrome, fibromyalgia and depression
Source: bioRxiv or medRxiv preprint supplement (doi:10.1101/2024.10.07.24315052), 2024-10-09

**Multi-ancestry GWAS of Long COVID identifies immune-related loci and etiological links to chronic fatigue syndrome, fibromyalgia and depression**

**Authors:** Ninad S. Chaudhary, Catherine H. Weldon, Priyanka Nandakumar, 23andMe Research Team, Michael V. Holmes\* and Stella Aslibekyan\*

\*co-senior authors

**Institution:** 23andMe, Inc

**SUPPLEMENTARY FIGURES**

### Supplementary Figure 1: Regional plot around *HLA-DQA1*–*HLA-DQB1* locus for Long COVID

The colors indicate the strength of LD relative to the index variant (rs9273363). The index variant is represented by gray color. Imputed variants are indicated with '+' symbols or 'x' symbols for coding variants. Directly genotyped variants are indicated by 'o' symbols or diamond symbols for coding variants.

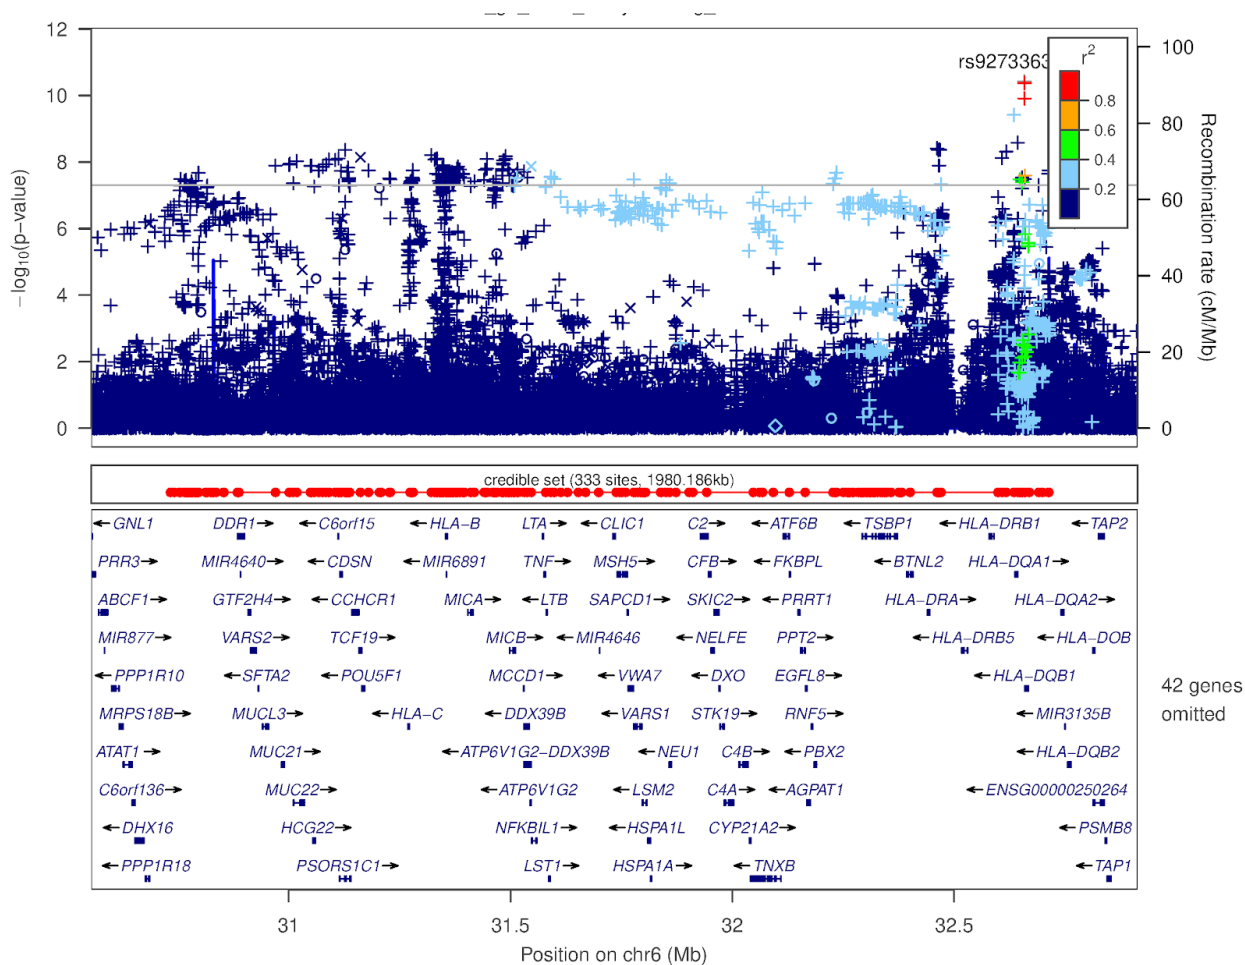

## Supplementary Figure 2: Forest plots representing meta-analysis estimates for four HLA alleles associated with Long COVID

The fixed effect model estimates in the plot depict odds ratios and 95% confidence intervals for each ancestry (European, Latino, and African-American) and multi-ancestry meta-analysis. The meta-analysis estimates are represented by diamond. The ancestry specific estimates are presented by square. The size of the square represents the contribution of a particular ancestry towards meta-analysis.

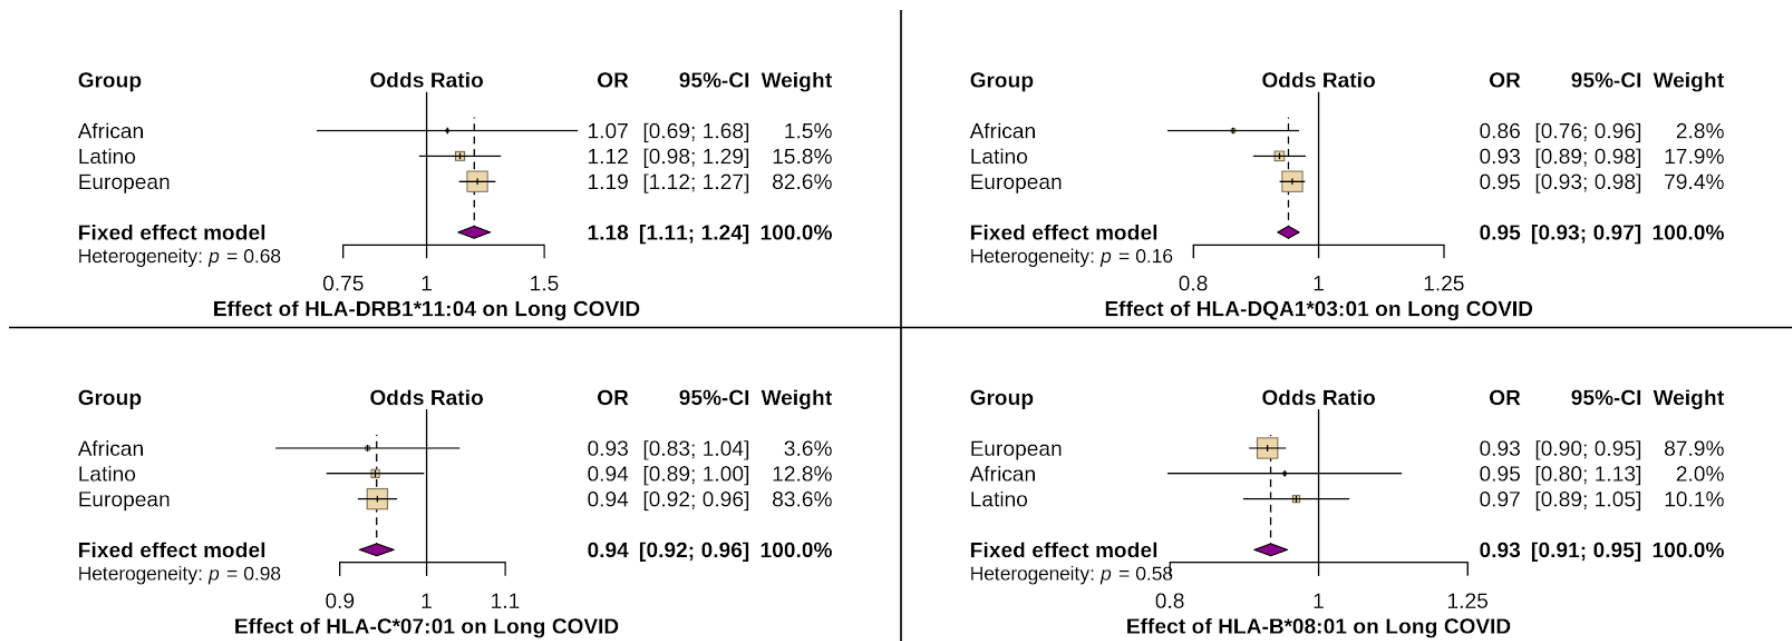

### Supplementary Figure 3: Regional plot around *ABO* locus for Long COVID

The colors indicate the strength of LD relative to the index variant (rs644234). The index variant is represented by gray color. Imputed variants are indicated with '+' symbols or 'x' symbols for coding variants. Directly genotyped variants are indicated by 'o' symbols or diamond symbols for coding variants.

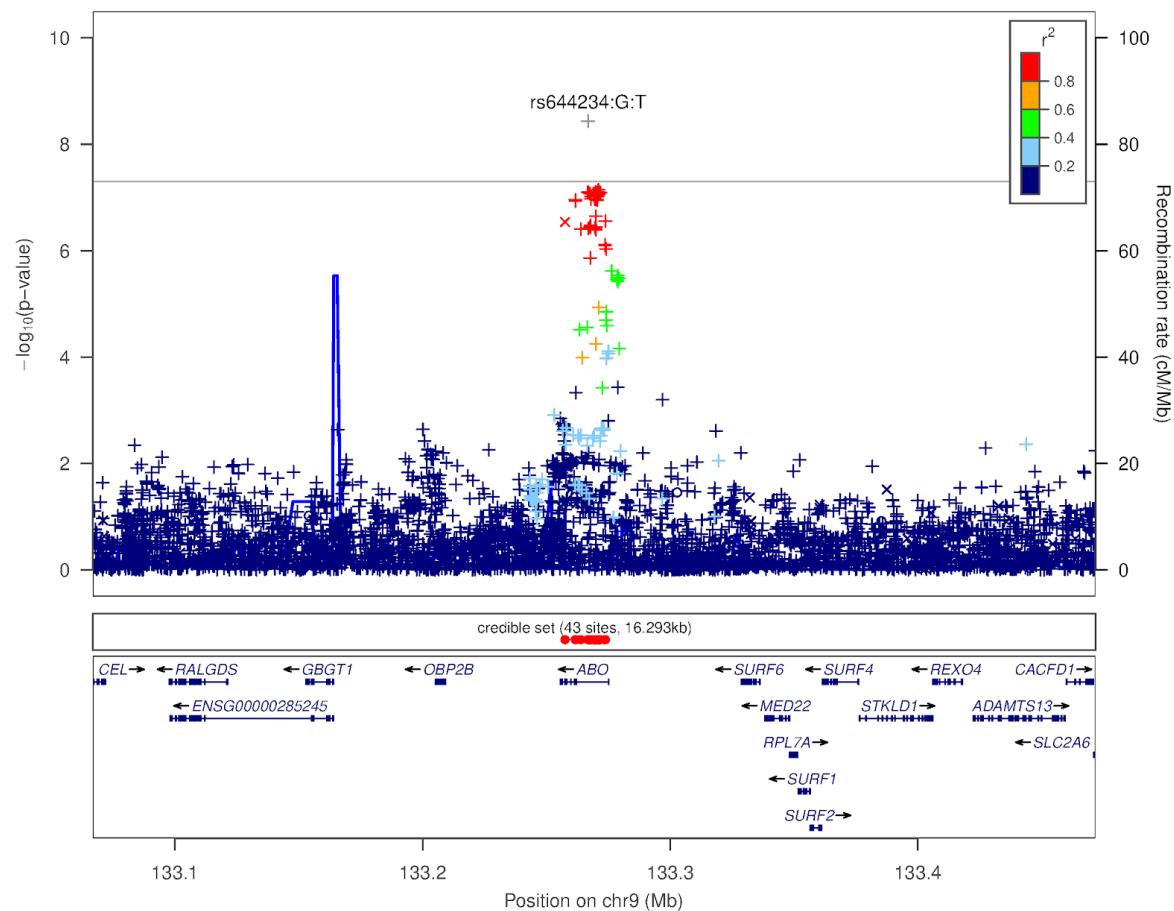

### Supplementary Figure 4: Regional plot around *BPTF* locus for Long COVID

The colors indicate the strength of LD relative to the index variant (rs2080090). The index variant is represented by gray color. Imputed variants are indicated with '+' symbols or 'x' symbols for coding variants. Directly genotyped variants are indicated by 'o' symbols or diamond symbols for coding variants.

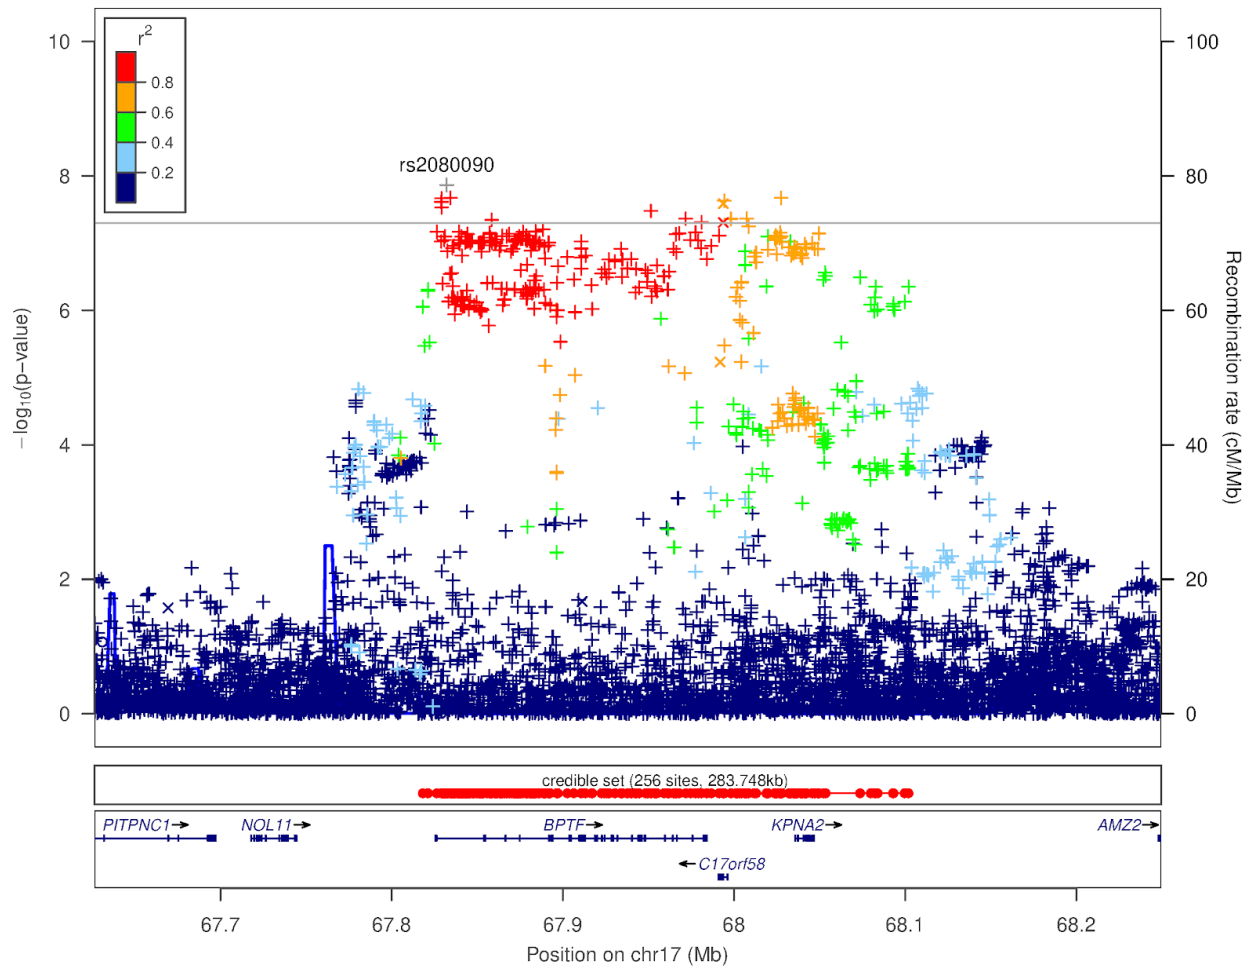

**Supplementary Figure 5: Manhattan plot of Long COVID Impact phenotype among 23andMe participants**

Manhattan plot depicts findings from the meta-analysis of three ancestral groups (European, African American, and Latinx). X-axis represents chromosomal position for each SNP. Y-axis represents negative log p-values based on logistic regression model under the additive model. Statistically significant variants are highlighted in red. The regions of associations are annotated with index variants.

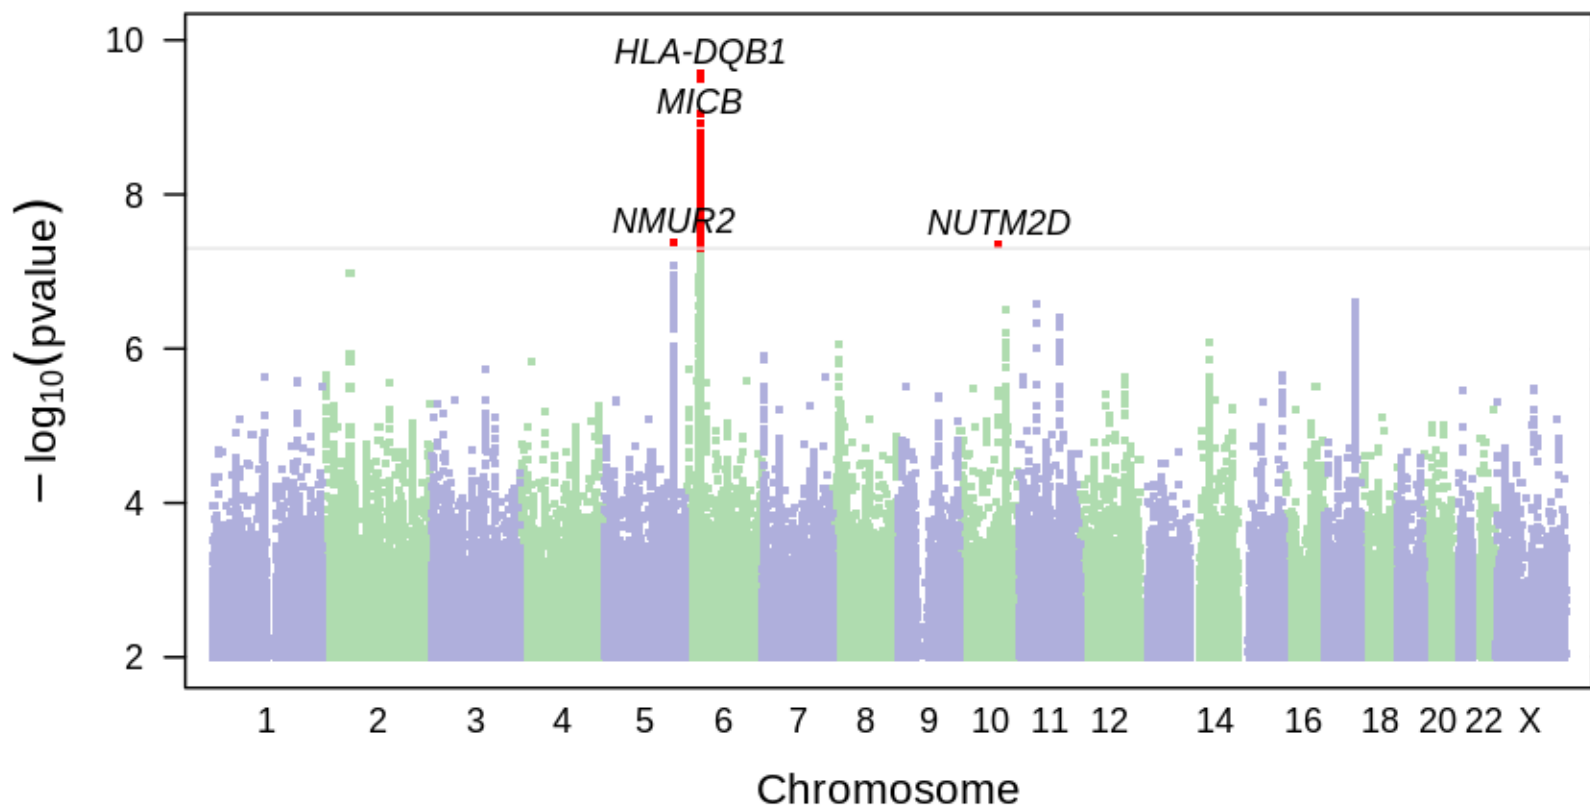

### Supplementary Figure 6: Regional plot around *MICB* locus for Long COVID Impact

The colors indicate the strength of LD relative to the index variant (rs9281499). The index variant is represented by gray color. Imputed variants are indicated with '+' symbols or 'x' symbols for coding variants. Directly genotyped variants are indicated by 'o' symbols or diamond symbols for coding variants.

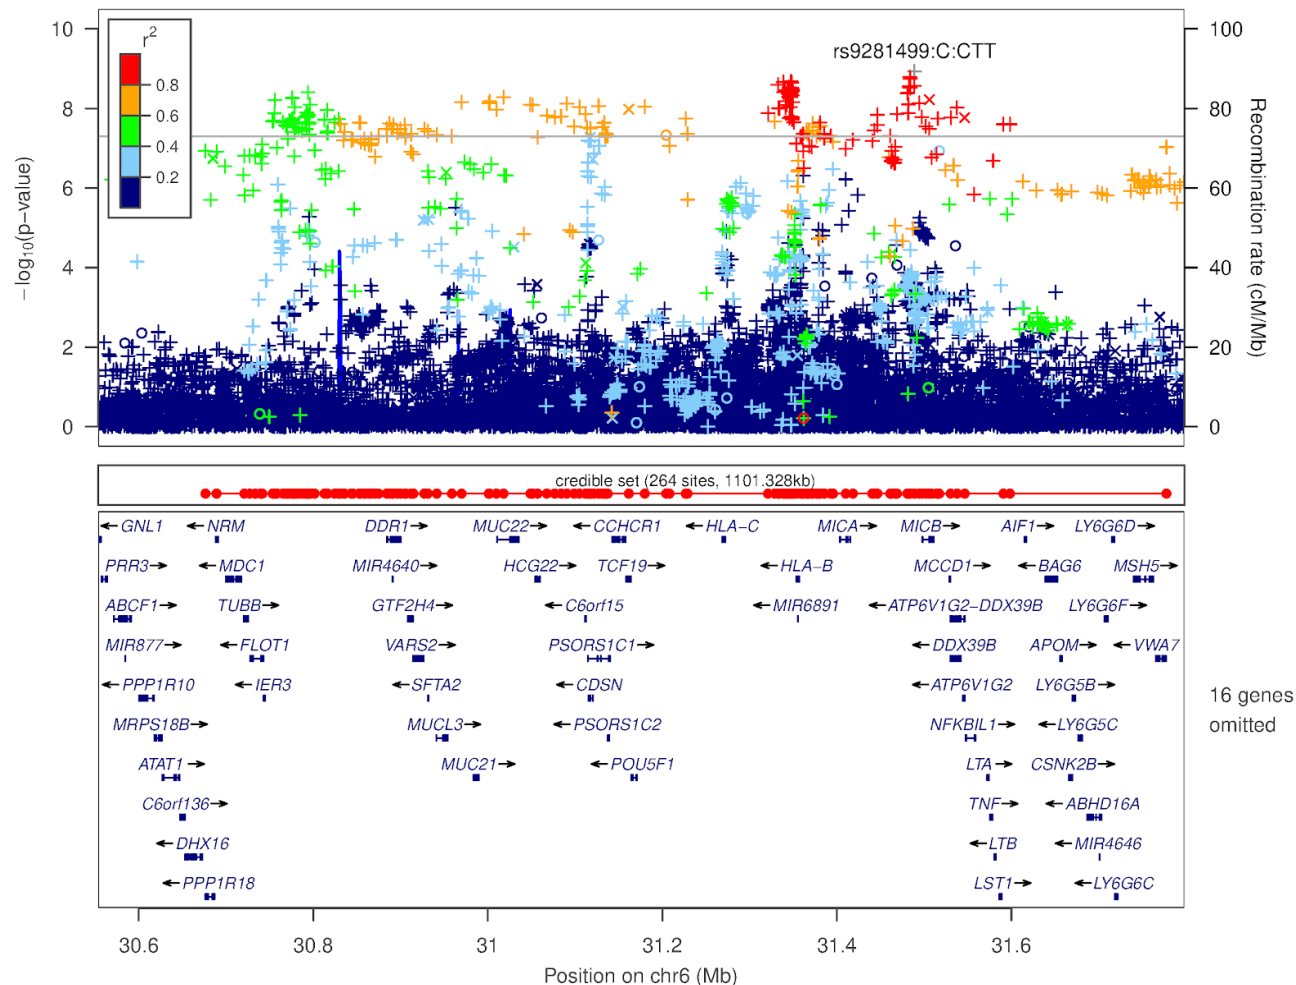

### Supplementary Figure 7: Regional plot around *NMUR2* and *GRIA1* locus for Long COVID Impact

The colors indicate the strength of LD relative to the index variant (rs58970548). The index variant is represented by gray color. Imputed variants are indicated with '+' symbols or 'x' symbols for coding variants. Directly genotyped variants are indicated by 'o' symbols or diamond symbols for coding variants.

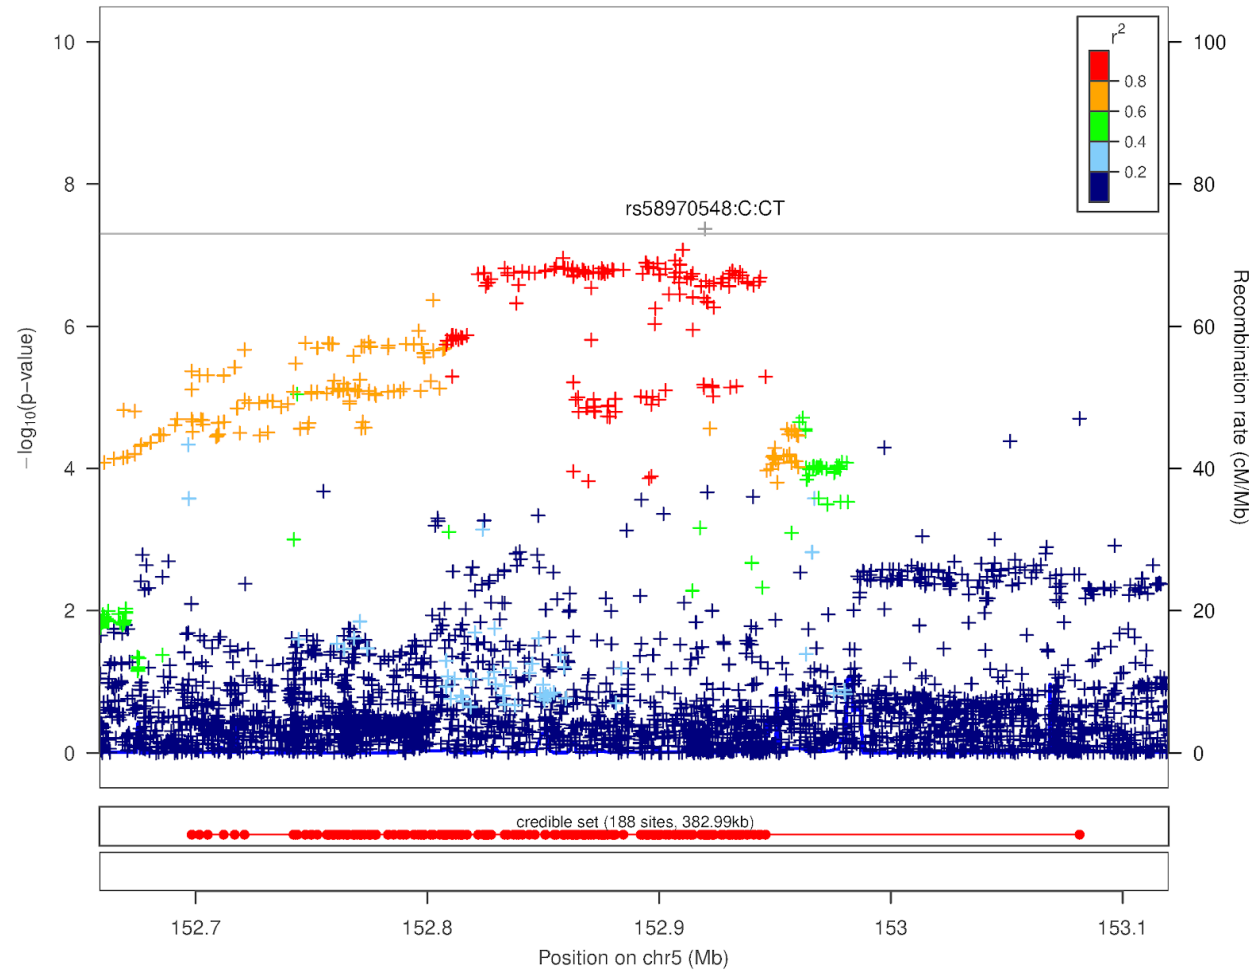



### Supplementary Figure 8: Regional plot around *NUTM2A* and *NUTM2D* locus for Long COVID

The colors indicate the strength of LD relative to the index variant (rs190759626). The index variant is represented by gray color. Imputed variants are indicated with '+' symbols or 'x' symbols for coding variants. Directly genotyped variants are indicated by 'o' symbols or diamond symbols for coding variants.

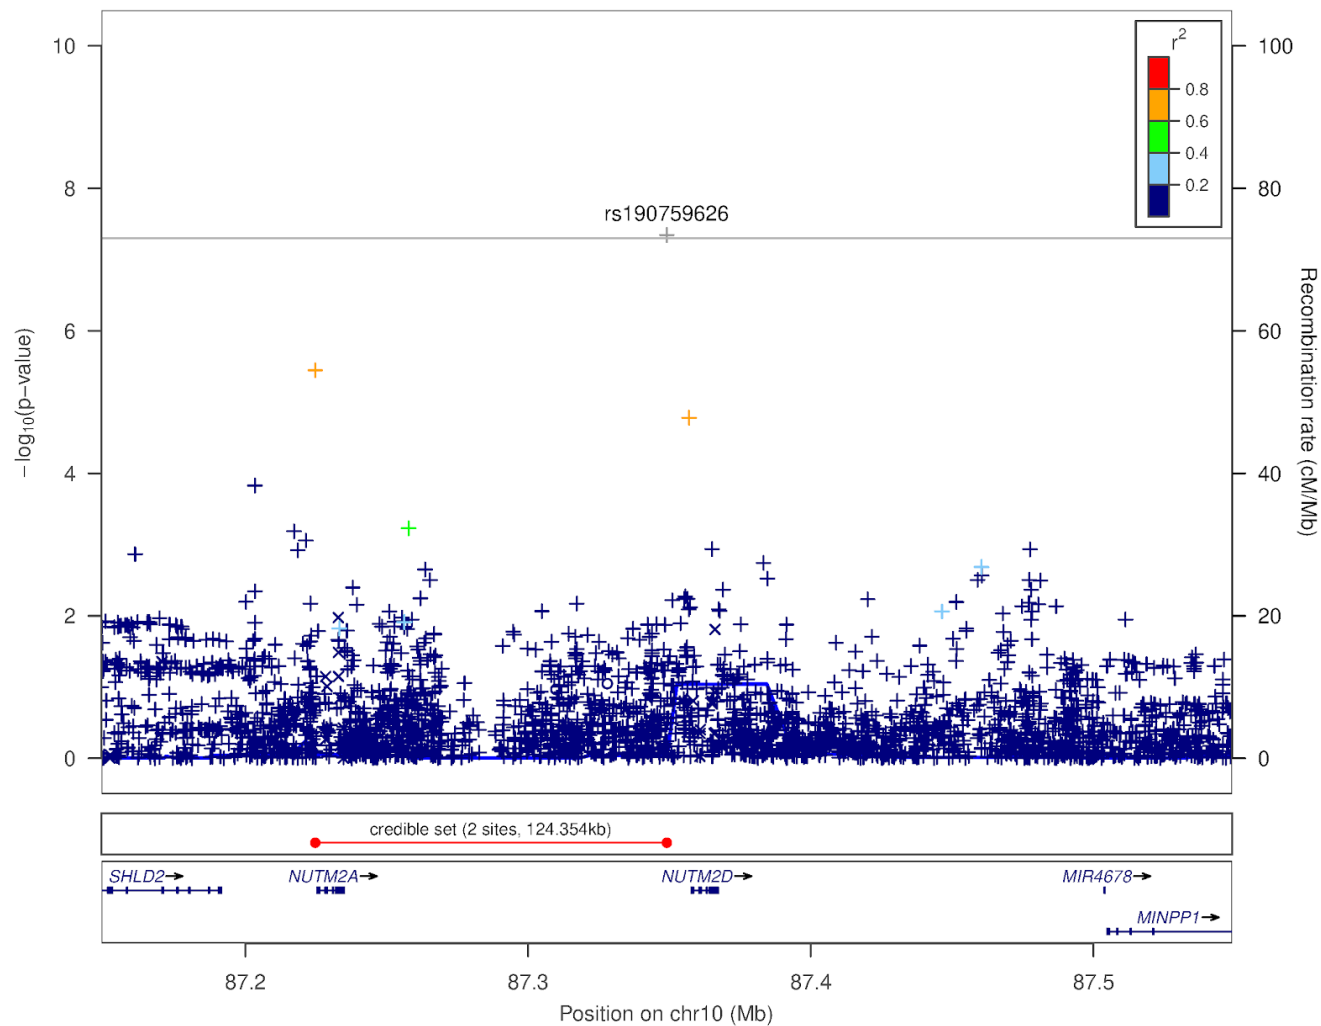

## Supplementary Figure 9: MR scatterplot of genetic associations between chronic phenotypes and Long COVID

**Panel A:** The genetic association and corresponding 95% confidence interval (CI) for each SNP (n = 186) with chronic fatigue (x-axis) and Long COVID (y-axis) are plotted. The plot represents estimates from three methods: random-effects inverse weighted variance method, weighted median, and random-effects MR Egger.

**Panel B:** The genetic association and corresponding 95% confidence interval (CI) for each SNP (n = 349) with fibromyalgia (x-axis) and Long COVID (y-axis) are plotted. The plot represents estimates from three methods: random-effects inverse weighted variance method, weighted median, and random-effects MR Egger.

**Panel C:** The genetic association and corresponding 95% confidence interval (CI) for each SNP (n = 696) with depression (x-axis) and Long COVID (y-axis) are plotted. The plot represents estimates from three methods: random-effects inverse weighted variance method, weighted median, and random-effects MR Egger.

The MR Egger intercepts are provided in **Supplementary Table 9a**.

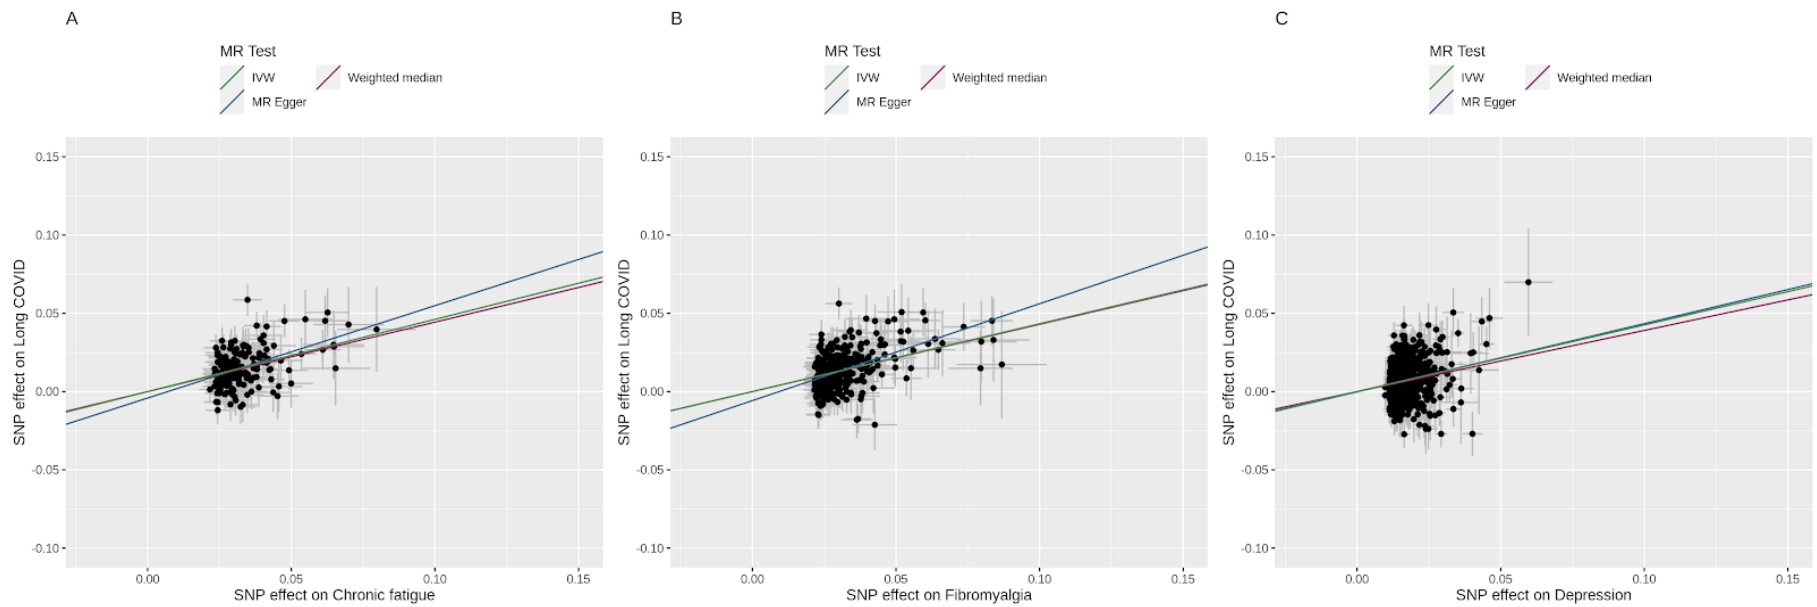

### Supplementary Figure 10: Forest plot representing genetically predicted effects of chronic phenotypes on Long COVID consortium using Mendelian randomization

The estimates in the plot depict odds ratio and 95% confidence intervals. The summary statistics for Long COVID were obtained from COVID-19 Host Genetics Initiative. Panel A represents MR estimates for chronic fatigue. The genetic instrument for chronic fatigue is derived using information from 186 SNPs (meanF statistic = 43.17). Panel B represents MR estimates for fibromyalgia. The genetic instrument for chronic fatigue is derived using information from 349 SNPs (meanF statistic = 45.04). Panel C represents MR estimates for depression. The genetic instrument for depression is derived using information from 696 SNPs (meanF statistic = 53.8). IVW = Inverse variance weighted.

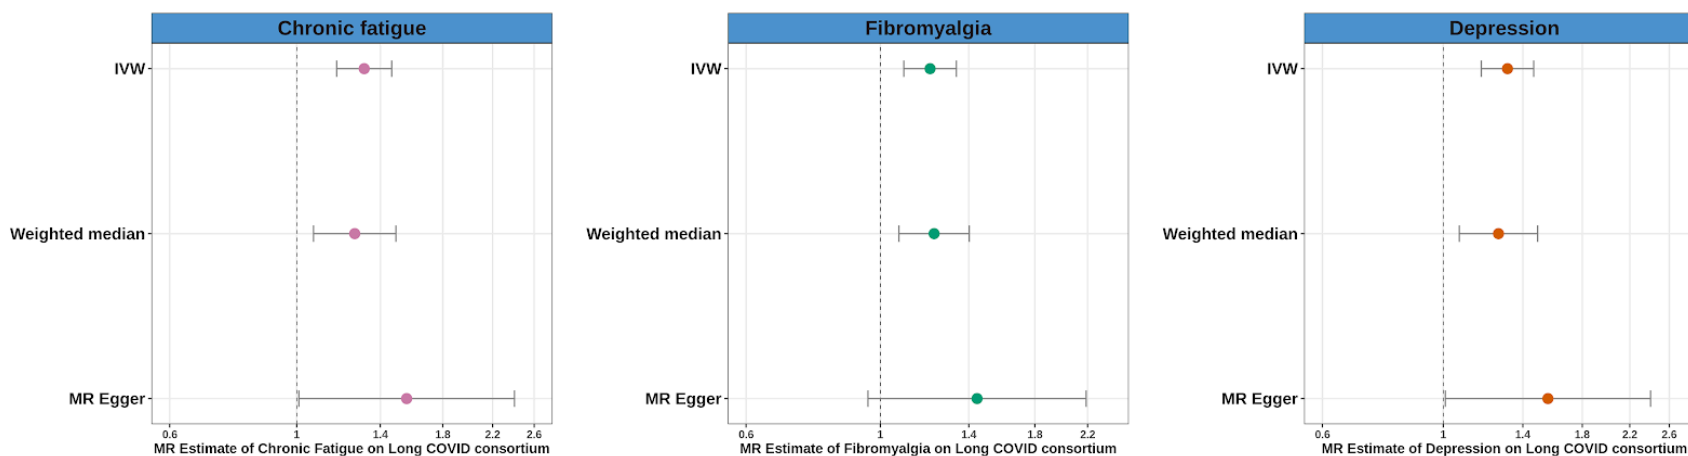

**Supplementary Figure 11: Forest plot representing genetically predicted effects of chronic phenotypes on COVID-19+ hospitalization from Long COVID consortium data using Mendelian randomization**

The estimates in the plot depict odds ratio and 95% confidence intervals. The summary statistics for COVID-19+ hospitalization were obtained from COVID-19 Host Genetics Initiative. Panel A represents MR estimates for chronic fatigue. The genetic instrument for chronic fatigue is derived using information from 186 SNPs (meanF statistic = 43.17). Panel B represents MR estimates for fibromyalgia. The genetic instrument for chronic fatigue is derived using information from 349 SNPs (meanF statistic = 45.04). Panel C represents MR estimates for depression. The genetic instrument for depression is derived using information from 696 SNPs (meanF statistic = 53.8). IVW = Inverse variance weighted.

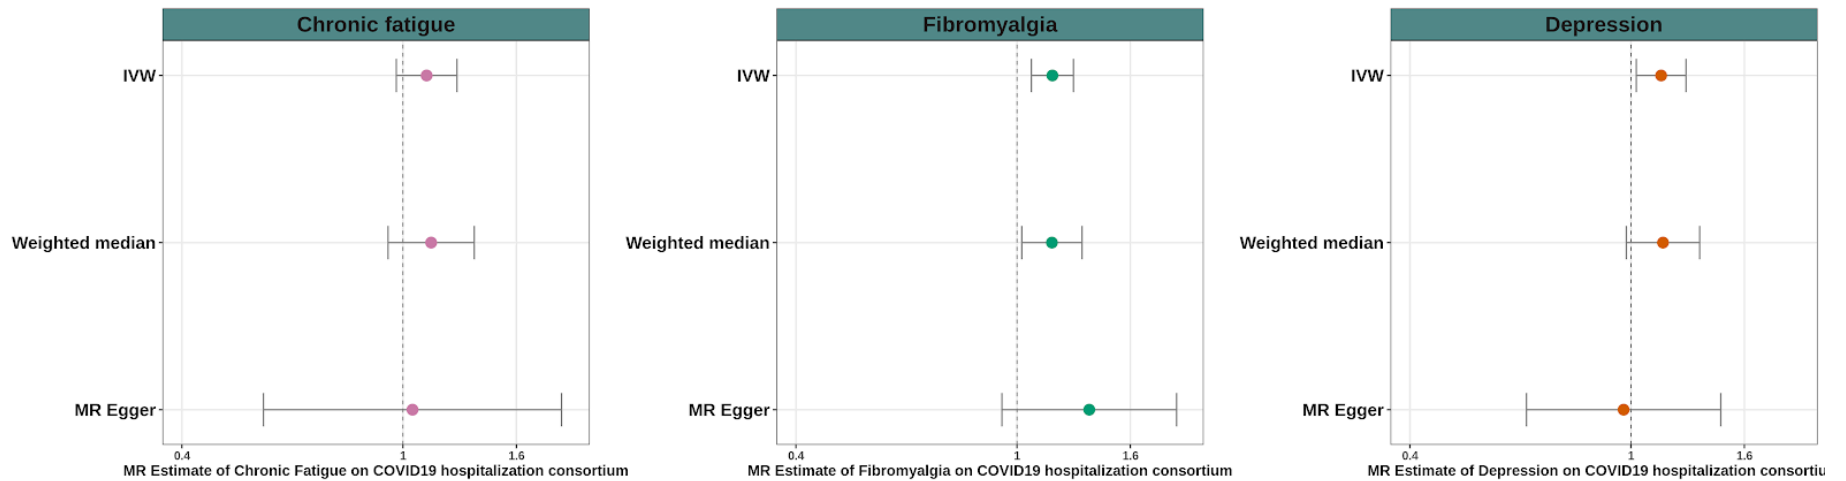

## Supplementary Figure 12: MR scatterplot of genetic associations between chronic phenotypes and Long COVID impact

**Panel A:** The genetic association and corresponding 95% confidence interval (CI) for each SNP ( $n = 186$ ) with chronic fatigue (x-axis) and Long COVID impact (y-axis) are plotted. The plot represents estimates from three methods: random-effects inverse weighted variance method, weighted median, and random-effects MR Egger.

**Panel B:** The genetic association and corresponding 95% confidence interval (CI) for each SNP ( $n = 349$ ) with fibromyalgia (x-axis) and Long COVID impact (y-axis) are plotted. The plot represents estimates from three methods: random-effects inverse weighted variance method, weighted median, and random-effects MR Egger.

**Panel C:** The genetic association and corresponding 95% confidence interval (CI) for each SNP ( $n = 696$ ) with depression (x-axis) and Long COVID impact (y-axis) are plotted. The plot represents estimates from three methods: random-effects inverse weighted variance method, weighted median, and random-effects MR Egger.

The MR Egger intercepts are provided in **Supplementary Table 9b**.

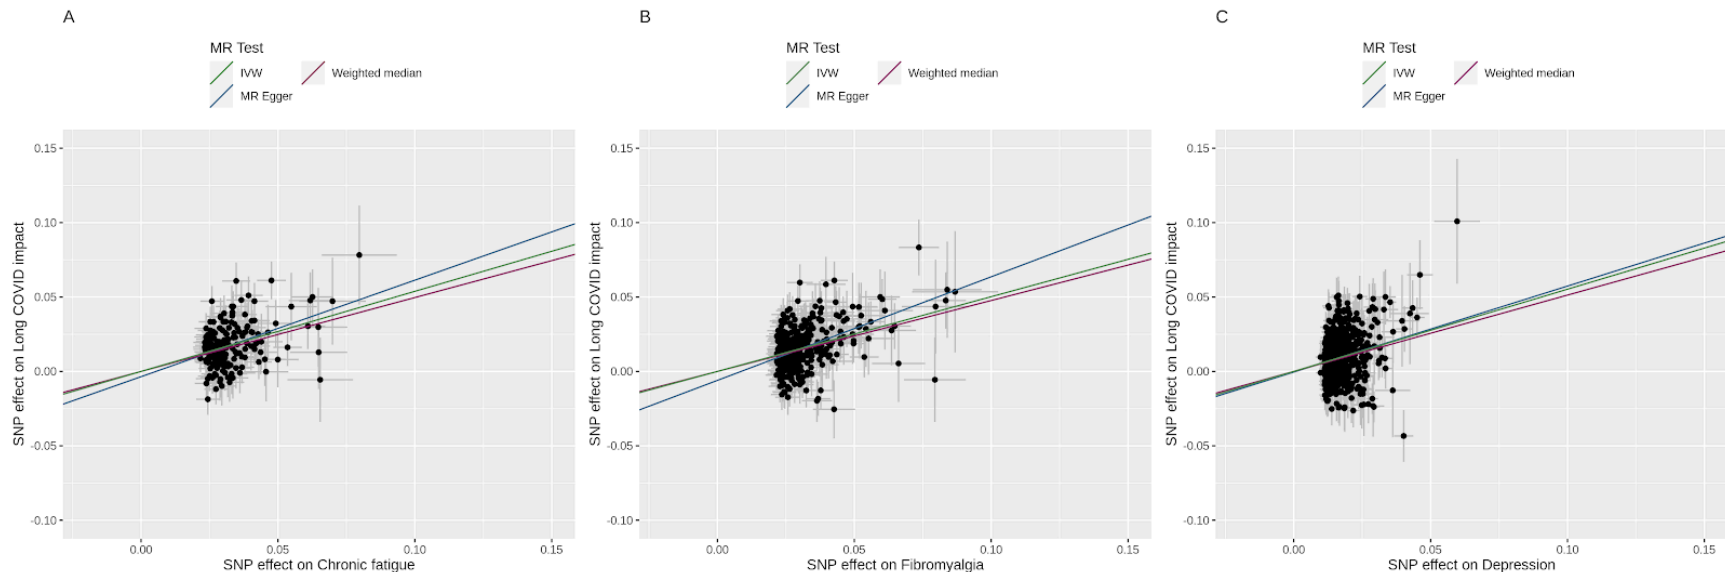

### Supplementary Figure 13: MR scatterplot of genetic associations between chronic phenotypes and COVID-19 hospitalization

**Panel A:** The genetic association and corresponding 95% confidence interval (CI) for each SNP (n = 186) with chronic fatigue (x-axis) and COVID-19 hospitalization (y-axis) are plotted. The plot represents estimates from three methods: random-effects inverse weighted variance method, weighted median, and random-effects MR Egger.

**Panel B:** The genetic association and corresponding 95% confidence interval (CI) for each SNP (n = 349) with fibromyalgia (x-axis) and COVID-19 hospitalization (y-axis) are plotted. The plot represents estimates from three methods: random-effects inverse weighted variance method, weighted median, and random-effects MR Egger.

**Panel C:** The genetic association and corresponding 95% confidence interval (CI) for each SNP (n = 696) with depression (x-axis) and COVID-19 hospitalization (y-axis) are plotted. The plot represents estimates from three methods: random-effects inverse weighted variance method, weighted median, and random-effects MR Egger.

The MR Egger intercepts are provided in **Supplementary Table 9c**.

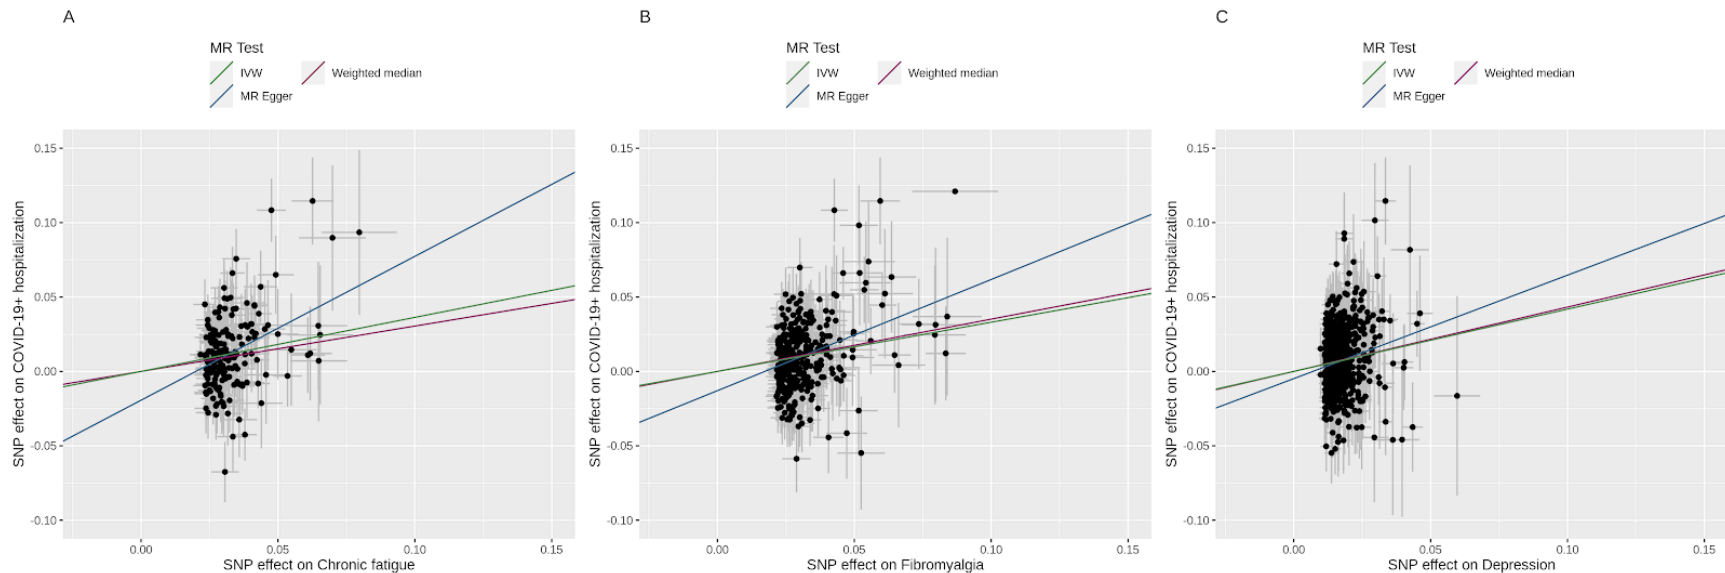

**Supplementary Figure 14: Forest plot representing genetically predicted effects of depression derived from external instruments on Long COVID using Mendelian randomization**

The estimates in the plot depict beta estimates and 95% confidence intervals. The summary statistics for depression were obtained from two sources. The genetic instrument [denoted by Meta-analysis in the figure] from meta-analysis from three largest multiple studies (UK Biobank, 23andMe study, and Psychiatric Genomics Consortium) included information from 87 SNPs (meanF statistic = 77.67). The second instrument [denoted by UK Biobank in the figure] derived from summary statistics of UK Biobank only included information from 35 SNPs (meanF statistic = 40.83). IVW = Inverse variance weighted. For comparison purposes, the estimates from the main MR analysis of depression on Long COVID using 23andMe data (**Figure3**) are included under sub-heading 23andMe

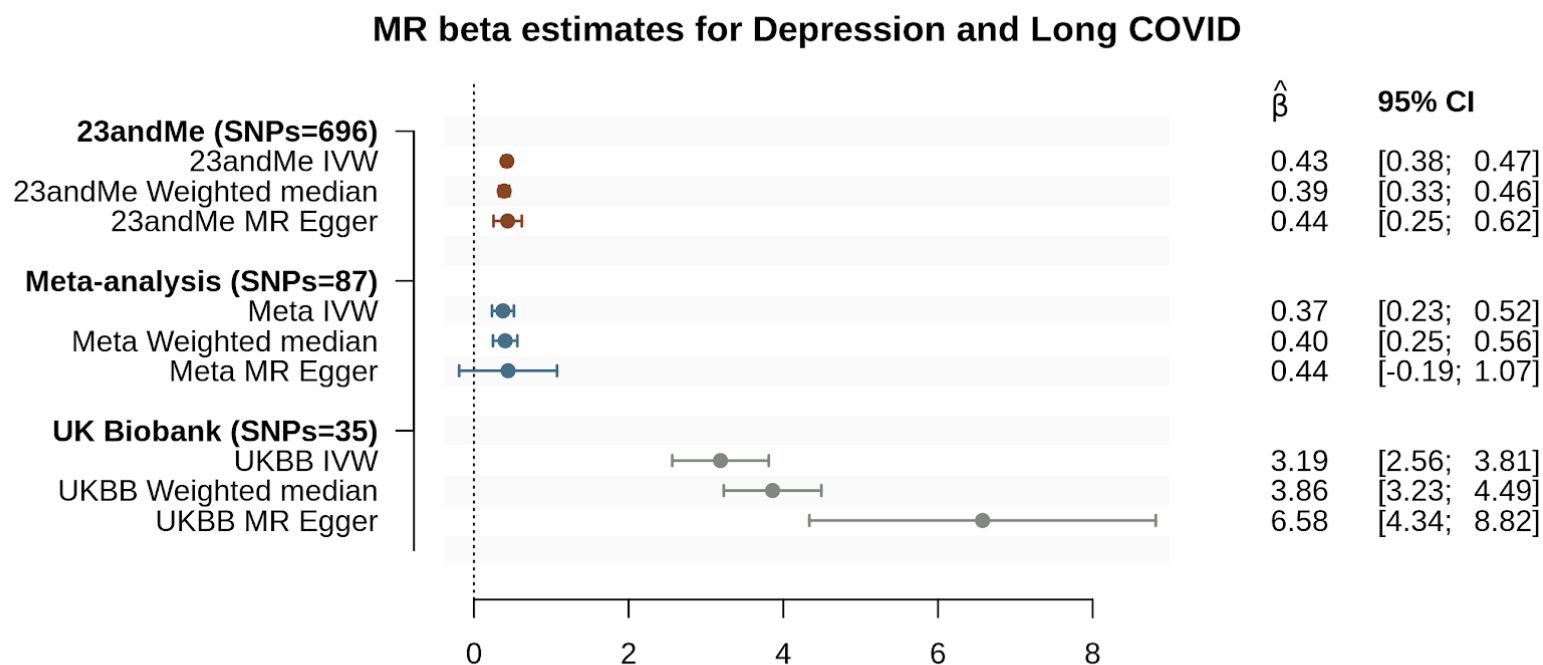

Supplement: Supplementary file [file media-3.pdf]
